# Supplementary material for: Analysis of the differences in the chemical composition of monascus rice and highland barley monascus
Source: Royal Society of Chemistry journal article supplement (doi:10.1039/d2fo00402j), 2022-01-01
Supplement: d2fo00402j1.pdf [file d2fo00402j1.pdf]

## Supplementary Material

### 1 Supplementary tables

| Number | Name                 | Batch number | Number | Name                            | Batch number |
|--------|----------------------|--------------|--------|---------------------------------|--------------|
| MR1    | <i>Monascus rice</i> | 20200817     | HBM1   | Highland barley <i>monascus</i> | 20191205     |
| MR2    | <i>Monascus rice</i> | 20200902     | HBM2   | Highland barley <i>monascus</i> | 20200304     |
| MR3    | <i>Monascus rice</i> | 20201103     | HBM3   | Highland barley <i>monascus</i> | 20200501     |
| MR4    | <i>Monascus rice</i> | 20201203     | HBM4   | Highland barley <i>monascus</i> | 20200503     |
| MR5    | <i>Monascus rice</i> | 202007       | HBM5   | Highland barley <i>monascus</i> | 20200505     |
| MR6    | <i>Monascus rice</i> | 20181129     | HBM6   | Highland barley <i>monascus</i> | 20200506     |
| MR7    | <i>Monascus rice</i> | 20190729     | HBM7   | Highland barley <i>monascus</i> | 20200607     |
| MR8    | <i>Monascus rice</i> | 20200509     | HBM8   | Highland barley <i>monascus</i> | 20200608     |
| MR9    | <i>Monascus rice</i> | 20200228     | HBM9   | Highland barley <i>monascus</i> | 20200609     |
| MR10   | <i>Monascus rice</i> | 20200212     | HBM10  | Highland barley <i>monascus</i> | 20200701     |

**Supplementary table 1.** Information of 20 batches of *monascus* rice and highland barley *monascus*.

## 2 Supplementary Figures

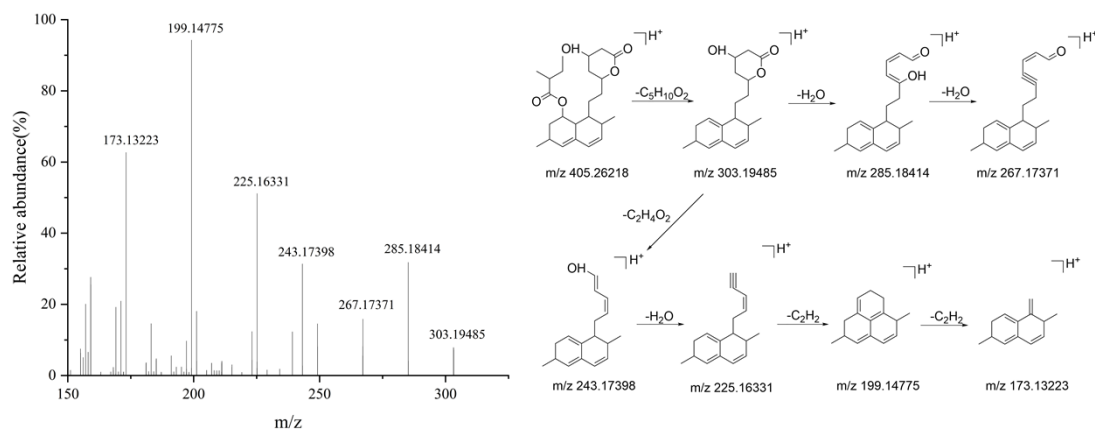

Supplementary figure 1. MS/MS spectra and potential fragmentation pathway of monacolins K ([M + H]<sup>+</sup>)

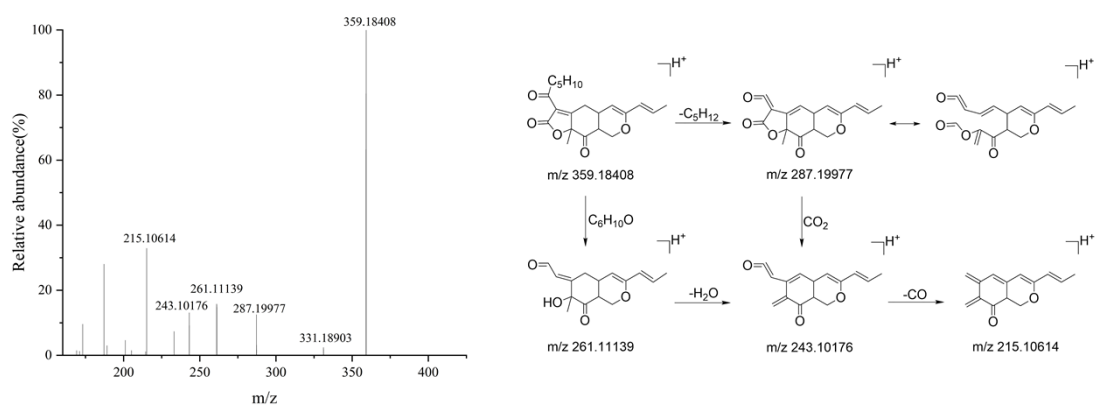

Supplementary figure 2. MS/MS spectra and potential fragmentation pathway of monascins ([M + H]<sup>+</sup>)

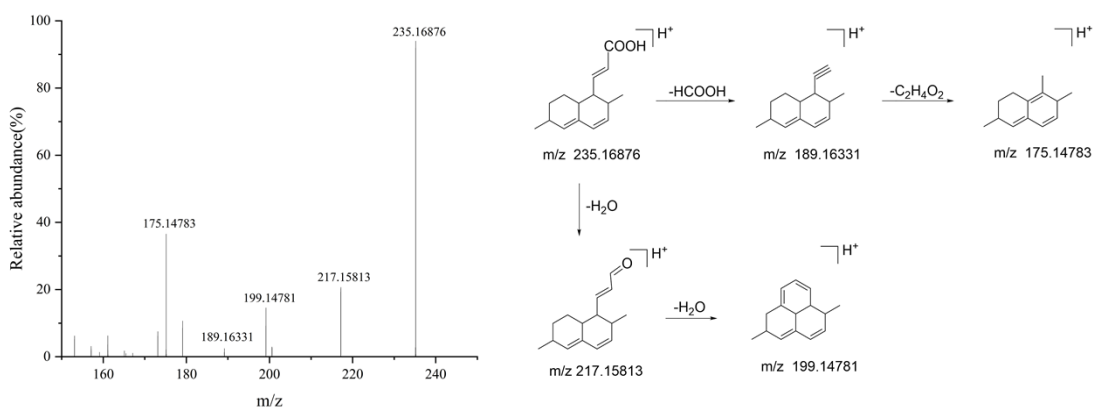

Supplementary figure 3. MS/MS spectra and potential fragmentation pathway of monascusic acid B ([M + H]<sup>+</sup>)

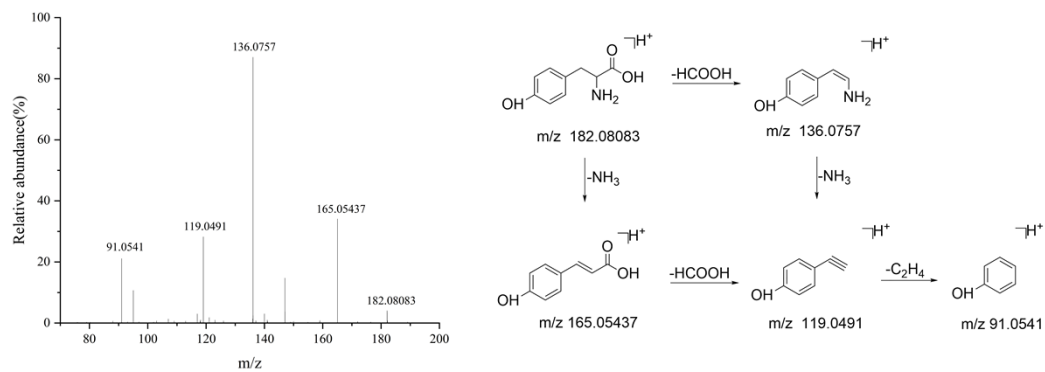

Supplementary figure 4. MS/MS spectra and potential fragmentation pathway of tyrosine ( $[\text{M} + \text{H}]^+$ )

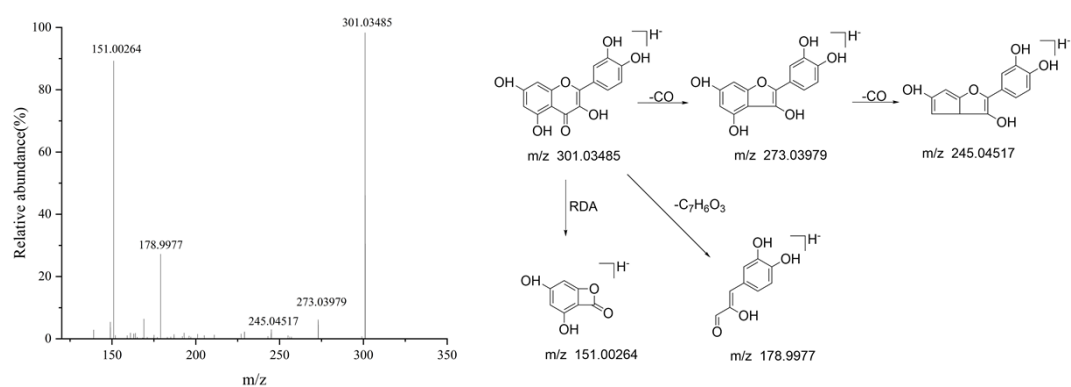

Supplementary figure 5. MS/MS spectra and potential fragmentation pathway of quercetin ( $[\text{M} - \text{H}]^-$ )

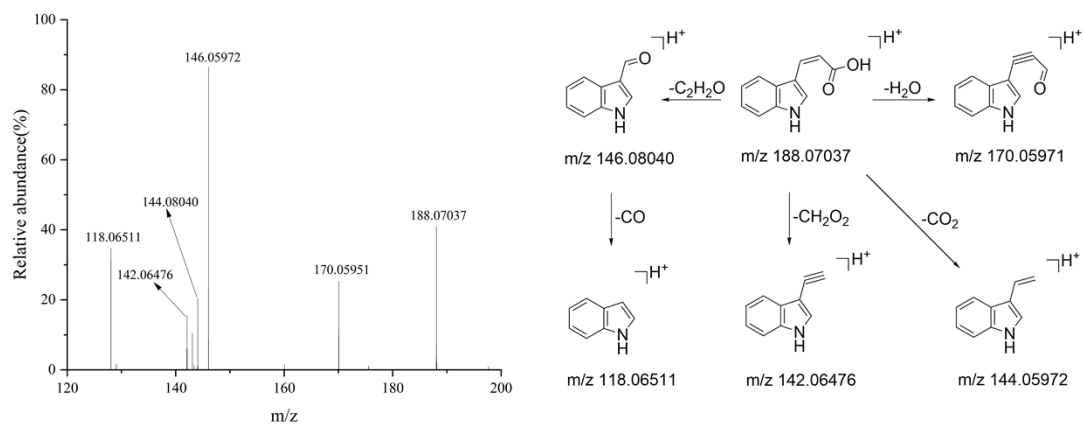

Supplementary figure 6. MS/MS spectra and potential fragmentation pathway of indo-3-acrylic acid ( $[\text{M} + \text{H}]^+$ )
